# Supplementary material for: Ketone body β-hydroxybutyrate is an autophagy-dependent vasodilator
Source: JCI journal article supplement (doi:10.1172/jci.insight.149037), 2021-09-09

**Ketone body  $\beta$ -hydroxybutyrate is an autophagy-dependent vasodilator**

Cameron G. McCarthy\*, Saroj Chakraborty, Gagandeep Singh, Beng San Yeoh, Zachary J. Schreckenberger, Avinash Singh, Blair Mell, Nicole R. Bearss, Tao Yang, Xi Cheng, Matam Vijay-Kumar, Camilla F. Wenceslau, & Bina Joe\*

Center for Hypertension & Personalized Medicine, Department of Physiology & Pharmacology, University of Toledo College of Medicine and Life Sciences, Toledo, OH, USA

**\*Corresponding authors:**

Cameron G. McCarthy and Bina Joe  
University of Toledo College of Medicine and Life Sciences  
Department of Physiology and Pharmacology  
Center for Hypertension and Precision Medicine  
Block Health Science Building  
3000 Arlington Ave, Toledo, OH 43614-2598  
Phone: (419) 383-4137  
Emails: [cameron.mccarthy@utoledo.edu](mailto:cameron.mccarthy@utoledo.edu) and [bina.joe@utoledo.edu](mailto:bina.joe@utoledo.edu)

**Conflict of interest statement**

The authors have declared that no conflict of interest exists.

## SUPPLEMENTARY FIGURES AND LEGENDS

Supplementary figure 1.

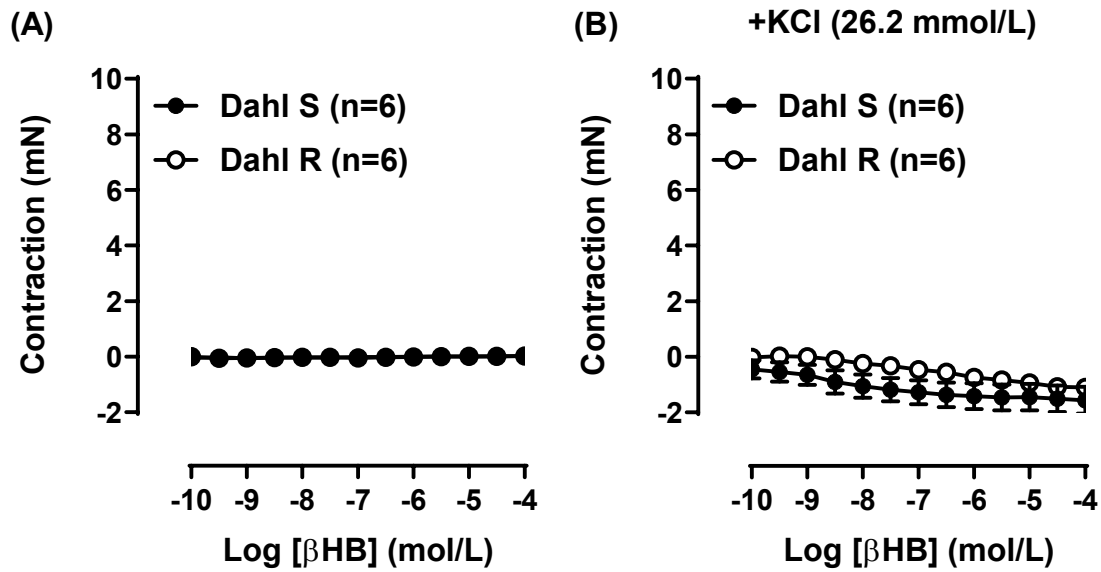

Supplementary figure 1.  $\beta$ -hydroxybutyrate ( $\beta$ HB) does not cause vascular contraction. Contraction concentration-response curves to  $\beta$ HB in mesenteric resistance arteries from Dahl S and Dahl R rats with basal tone (A) and after contraction to a low depolarizing concentration of potassium chloride (KCl, 26.2 mmol/L) (B). Mean  $\pm$  SEM. n=6.

Supplementary figure 2.

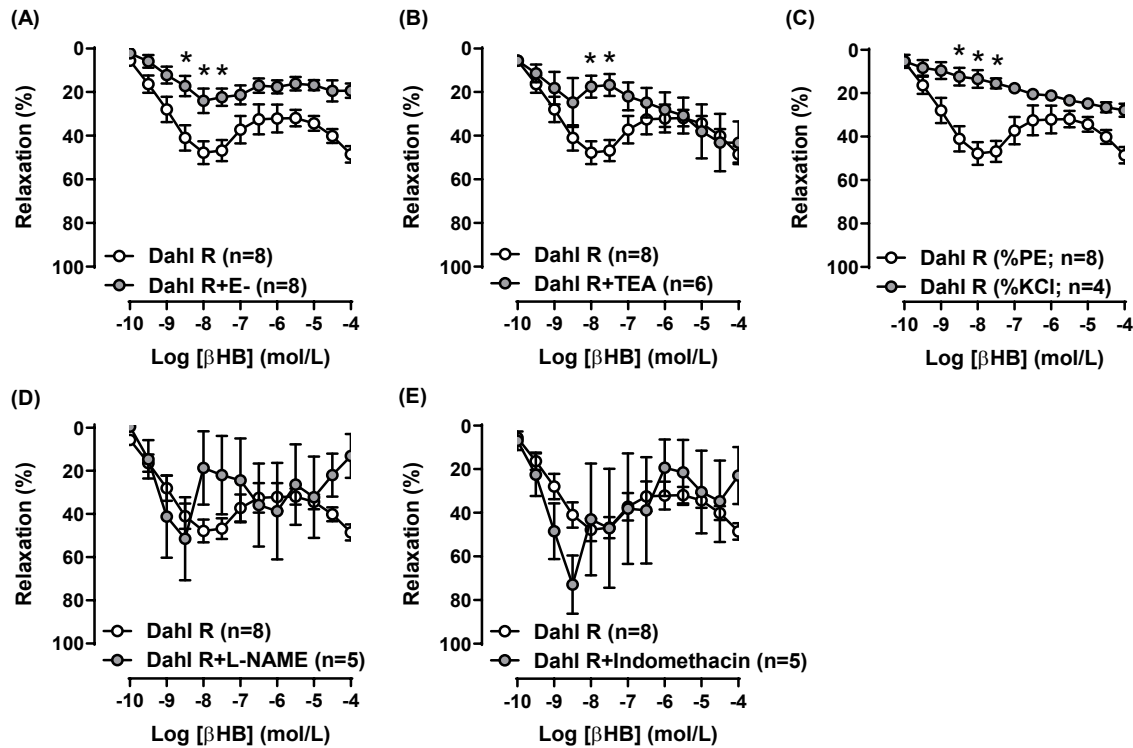

Supplementary figure 2. Concentration-response curves to  $\beta$ -hydroxybutyrate ( $\beta$ HB) in mesenteric resistance arteries from Dahl R rats. Some arteries were endothelium denuded (E-) (A), incubated with tetraethylammonium (TEA, 10 mmol/L) (B), contracted to potassium chloride (KCl, 120 mmol/L), as opposed to phenylephrine (10  $\mu$ mol/L) (C), incubated with N $\omega$ -Nitro-L-arginine methyl ester (L-NAME, 100  $\mu$ mol/L) (D), or incubated with indomethacin (10  $\mu$ mol/L) (E). Mean  $\pm$  SEM. n=4-8. Two-way ANOVA: \* $p < 0.05$ .

Supplementary figure 3.

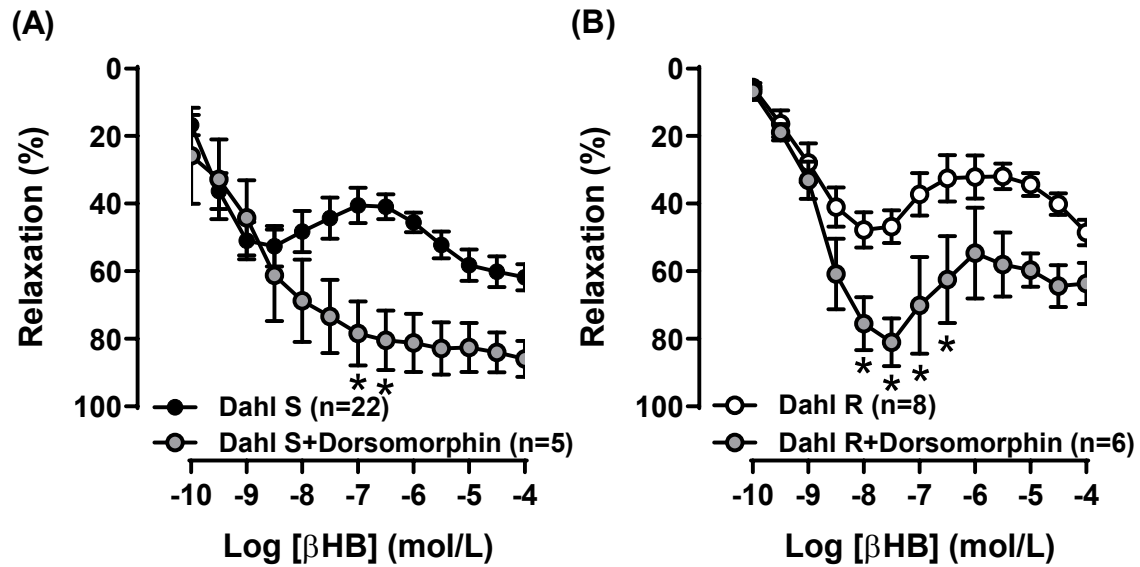

Supplementary figure 3.  $\beta$ -hydroxybutyrate ( $\beta$ HB)-dependent vasodilation is not mediated by AMPK $\alpha$ . Concentration-response curves to  $\beta$ HB in mesenteric resistance arteries from Dahl S (A) and Dahl R (B) rats, with and without the AMPK $\alpha$  inhibitor dorsomorphin (10  $\mu$ mol/L). Mean  $\pm$  SEM. n=5-21. Two-way ANOVA: \*p<0.05.

Supplementary figure 4.

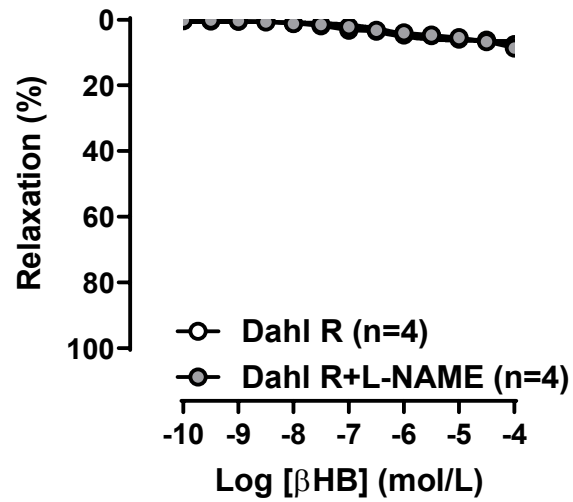

Supplementary figure 4.  $\beta$ -hydroxybutyrate ( $\beta$ HB)-dependent causes minimal nitric oxide-independent vasodilation in aorta. Concentration-response curves to  $\beta$ HB in aortic segments from Dahl R rats, with and without N $\omega$ -Nitro-L-arginine methyl ester (L-NAME, 100  $\mu$ mol/L). Mean  $\pm$  SEM. n=4.

### Supplementary figure 5.

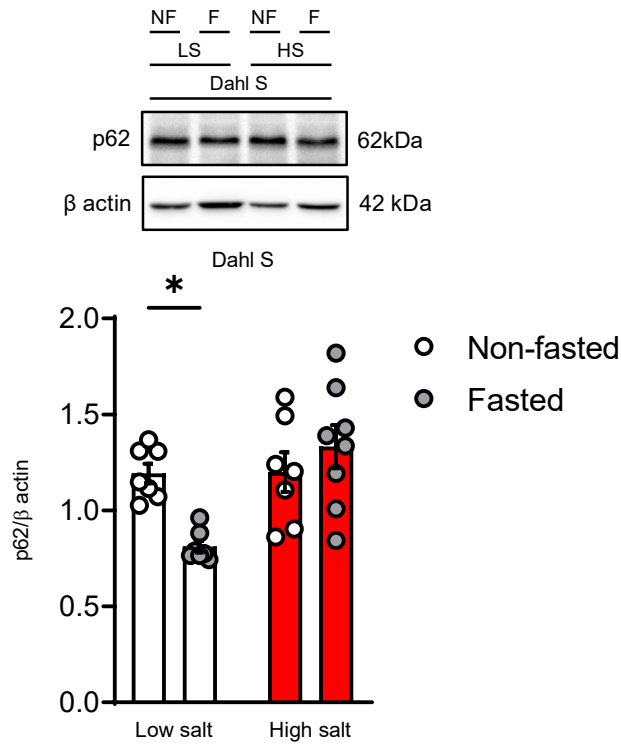

Supplementary figure 5. High salt diet negatively regulates autophagic activity. Protein expression analysis was performed for p62 normalized to  $\beta$  actin in liver biopsies from non-fasted (free access to food) and fasted (24 h) Dahl S rats that had consumed a low or high salt diet for 8 weeks. *Above*, representative images of immunoblots; *below*, densitometric analysis. Mean  $\pm$  SEM. n=7-8. Two-way ANOVA: \*p<0.05.

Supplementary figure 6.

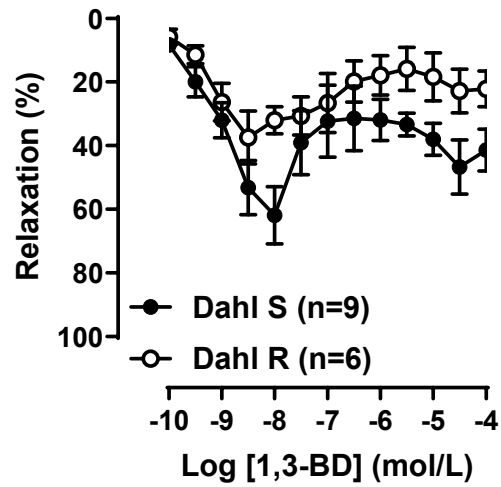

Supplementary figure 6. 1,3-Butanediol (1,3-BD) causes potent vasodilation, similar to  $\beta$ -hydroxybutyrate ( $\beta$ HB). Concentration-response curves to 1,3-BD in mesenteric resistance arteries from Dahl S (A) and Dahl R (B) rats. Mean  $\pm$  SEM. n=6-9. Two-way ANOVA: \*p<0.05.

Supplementary figure 7.

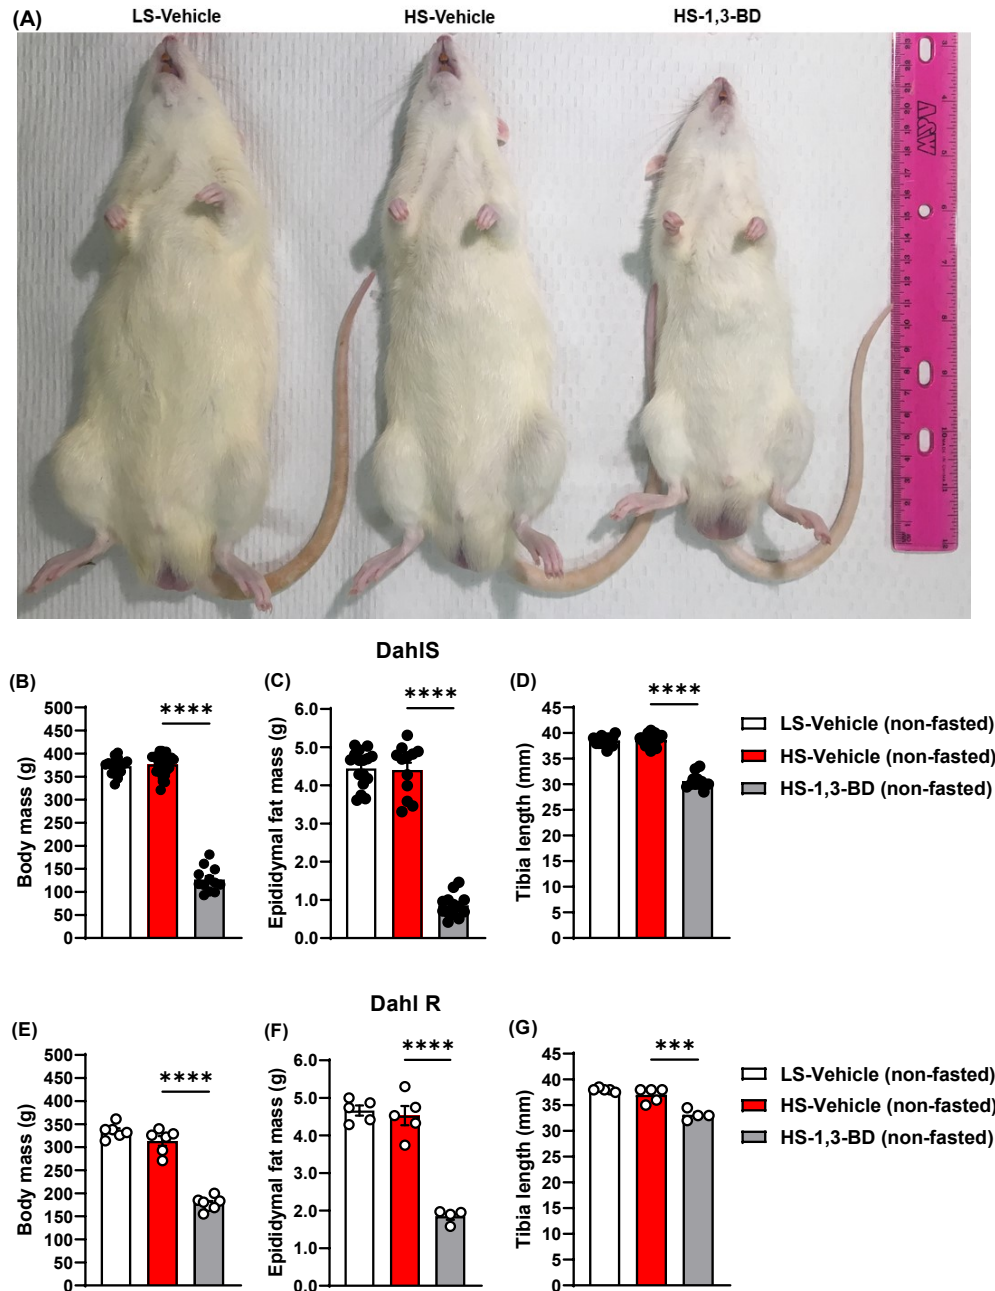

Supplementary figure 7. Reconstitution of  $\beta$ -hydroxybutyrate ( $\beta$ HB) bioavailability with 1,3-butanediol (1,3-BD) stunts growth. Dahl S and Dahl R rats were treated with either a low salt (LS) diet, a high salt (HS) diet, or a HS diet in conjunction with 1,3-BD (20% v/v) for eight weeks. Pictured are Dahl R rats after treatment (A). Body mass (B and E), epididymal fat mass (C and F), and tibia length (D and G) were measured in Dahl S and Dahl R rats, respectively. Mean  $\pm$  SEM. n=4-28. One-way ANOVA: \*\*\*p<0.001, \*\*\*\*p<0.0001.

## Supplementary figure 8.

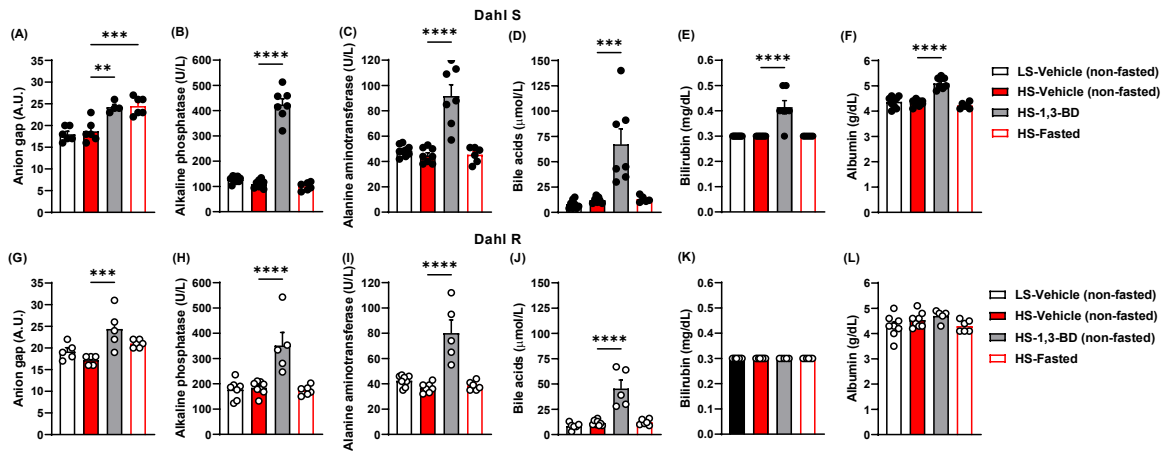

Supplementary figure 8. 1,3-Butanediol (1,3-BD) treatment causes metabolic acidosis and hepatotoxicity. Dahl S and Dahl R rats were treated with either a low salt (LS) diet, a high salt (HS) diet, or a HS diet in conjunction with 1,3-BD (20% v/v) for eight weeks. Some HS-fed rats from both strains were fasted for 24 h as a positive control. The anion gap (A and G), liver enzymes alkaline phosphatase (B and H) and alanine aminotransferase (C and I), bile acids (D and J), bilirubin (E and K), and albumin (F and L) were measured in serum from Dahl S and Dahl R rats, respectively. Mean  $\pm$  SEM. n=4-10. One-way ANOVA: \*\*p<0.01, \*\*\*p<0.001, \*\*\*\*p<0.0001.

Supplementary figure 9.

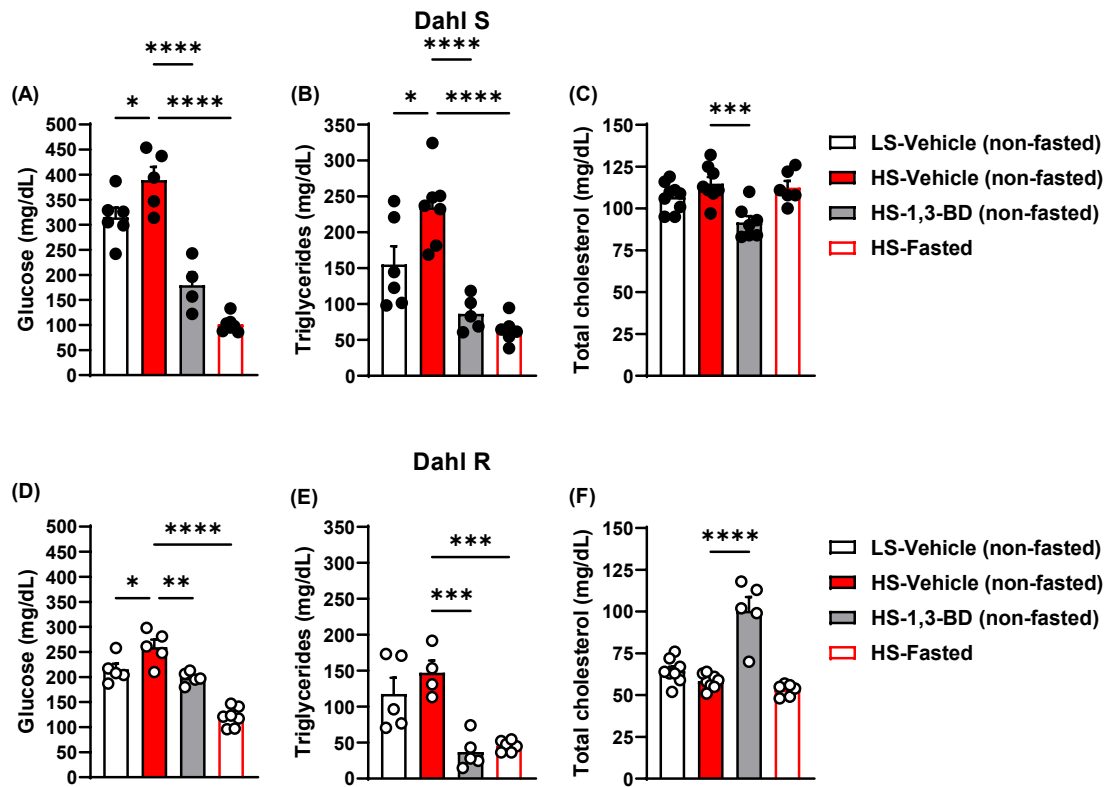

Supplementary figure 9. 1,3-Butanediol (1,3-BD) is a caloric restriction mimetic. Dahl S and Dahl R rats were treated with either a low salt (LS) diet, a high salt (HS) diet, or a HS diet in conjunction with 1,3-BD (20% v/v) for eight weeks. Some HS-fed rats from both strains were fasted for 24 h as a positive control. Circulating glucose (A and D), triglycerides (B and E), and total cholesterol (C and F) were measured in serum from Dahl S and Dahl R rats, respectively. Mean  $\pm$  SEM. n=4-9. One-way ANOVA: \* $p$ <0.05, \*\* $p$ <0.01, \*\*\* $p$ <0.001, \*\*\*\* $p$ <0.0001.

**Ketone body  $\beta$ -hydroxybutyrate is an autophagy-dependent vasodilator**

**Uncropped Western bots**

McCarthy *et al.*

Submission to JCI Insights

# How to read the uncropped/unrotated membranes: Set 1 loading

NF: Non-fasting  
F: Fasting  
LS: Low-salt  
HS: High salt

| F               | NF | F  | NF | F               | NF | F  | NF |
|-----------------|----|----|----|-----------------|----|----|----|
| HS              |    | LS |    | HS              |    | LS |    |
| Dahl S sample 1 |    |    |    | Dahl R sample 1 |    |    |    |

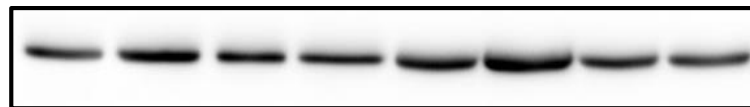

L  
A  
D  
D  
E  
R

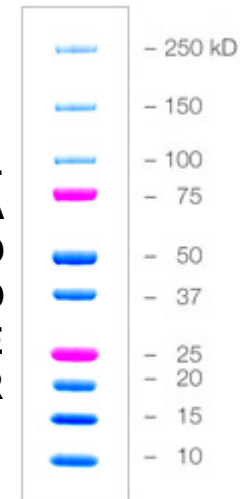

161-0374, Bio-rad (15 µl)

\*Dahl S and Dahl R were analyzed independently

\*\*Gel 6 consisted of two sets of Dahl S samples, and no Dahl R

# Hepatic LC3B-I and -II ~19 and 17 kDa

Gel 1

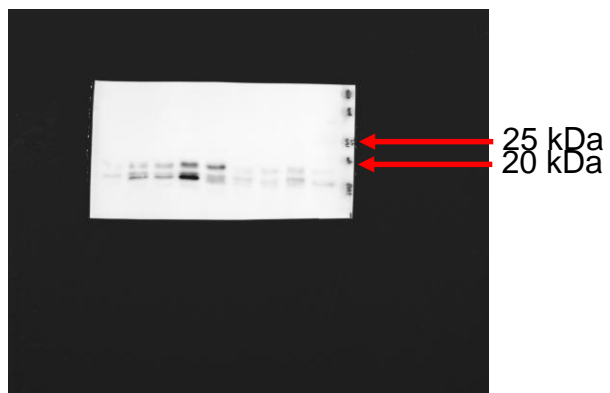

Gel 2

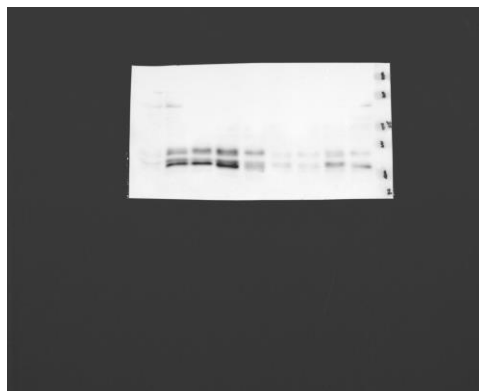

Gel 3

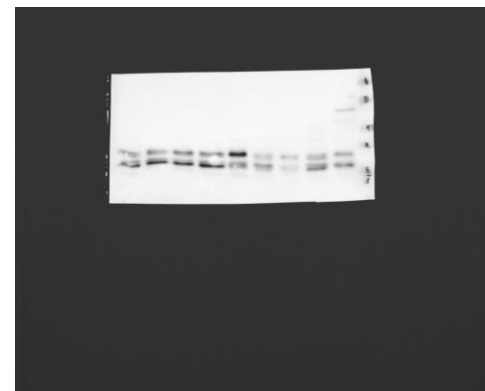

Gel 4

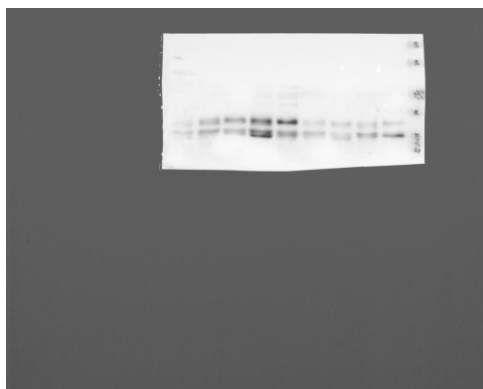

Gel 5

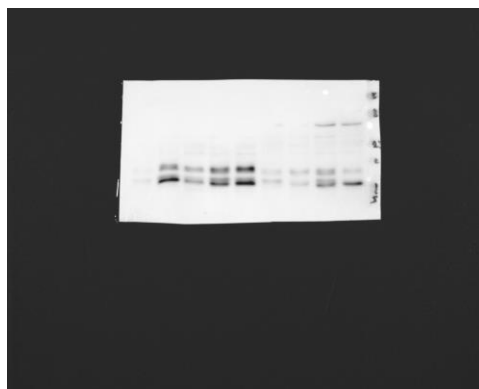

Gel 6

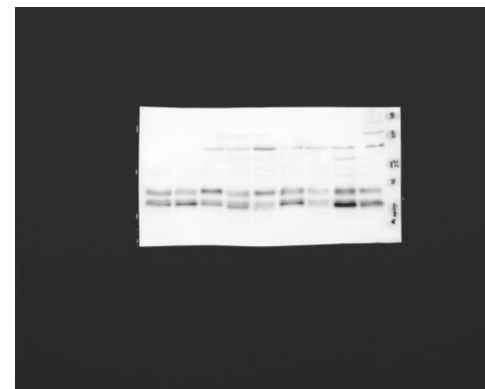

# Hepatic $\beta$ actin – 42 kDa

Gel 1

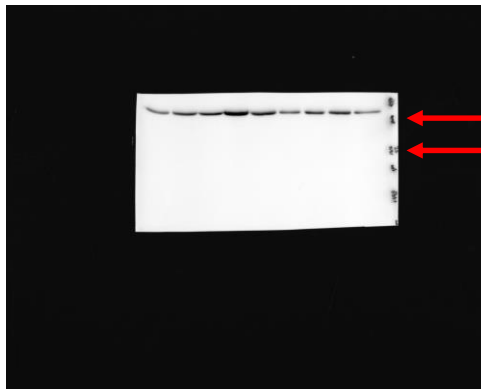

37 kDa  
25 kDa

Gel 2

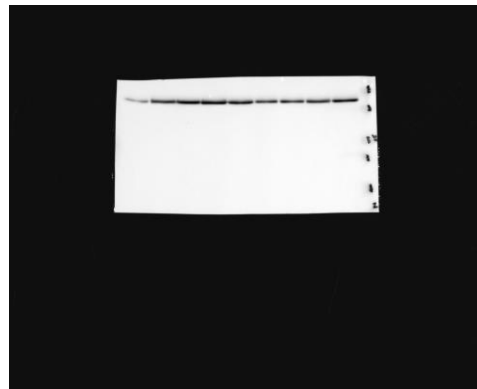

Gel 3

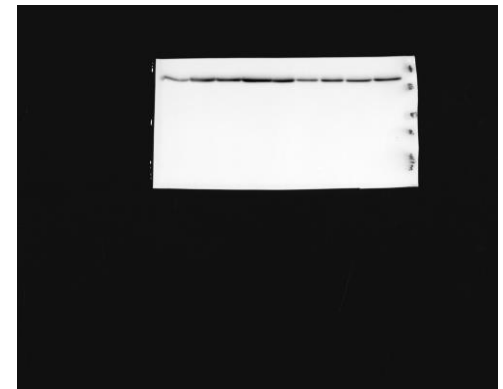

Gel 4

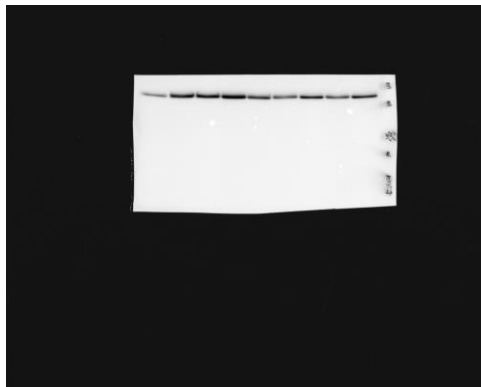

Gel 5

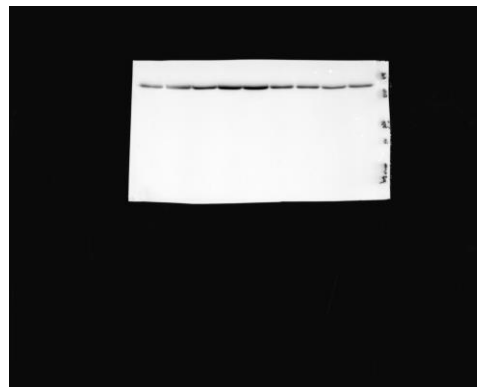

Gel 6

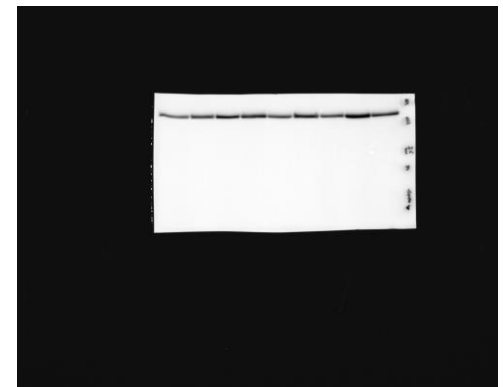

# How to read the uncropped/unrotated membranes: Set 2 loading

In set 1, Dahl S samples, for an unknown reason, saturated the images and decreased the pixel density of Dahl R samples. Therefore, in set 2, Dahl R samples were run on their own gels.

NF: Non-fasting  
F: Fasting  
LS: Low-salt  
HS: High salt

| Dahl R sample 2 |    |    |    | Dahl R sample 1 |    |    |    |
|-----------------|----|----|----|-----------------|----|----|----|
| F               | NF | F  | NF | F               | NF | F  | NF |
| HS              |    | LS |    | HS              |    | LS |    |

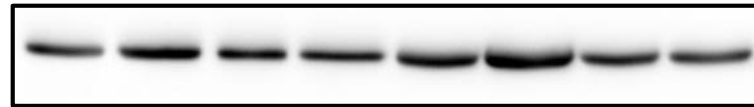

L  
A  
D  
D  
E  
R

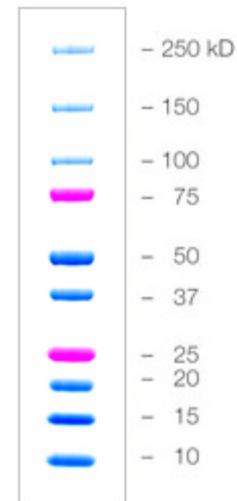

161-0374, Bio-rad (15 µl)

# Hepatic LC3B-I and -II ~19 and 17 kDa

Gel 1

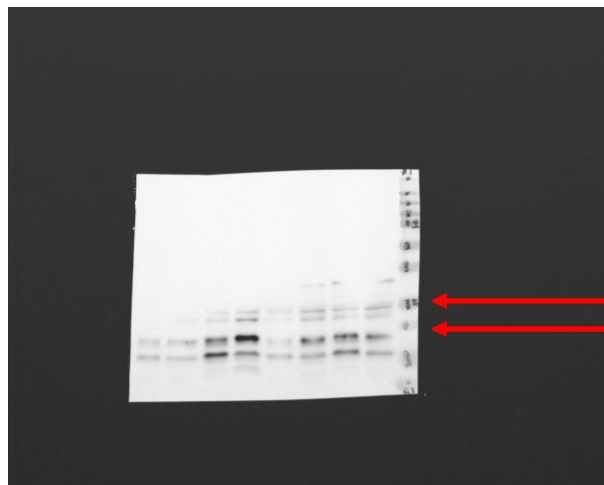

Dahl R

Gel 2

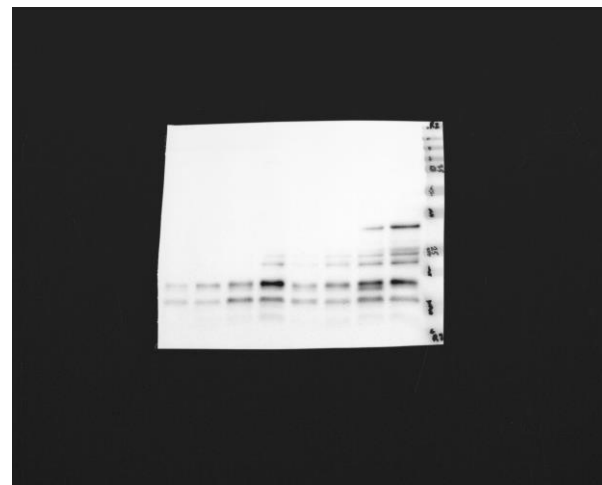

Gel 3

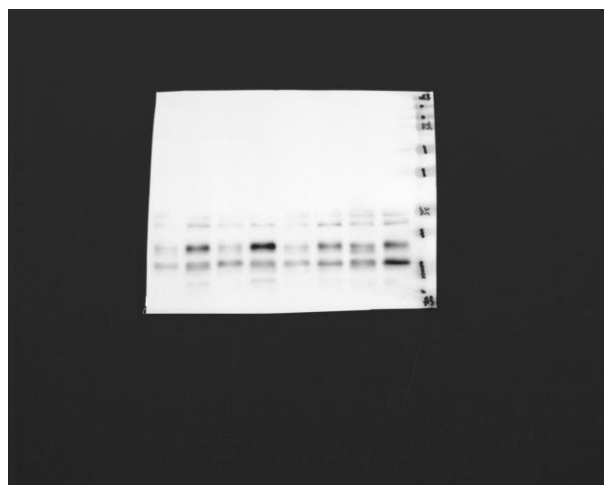

Gel 4

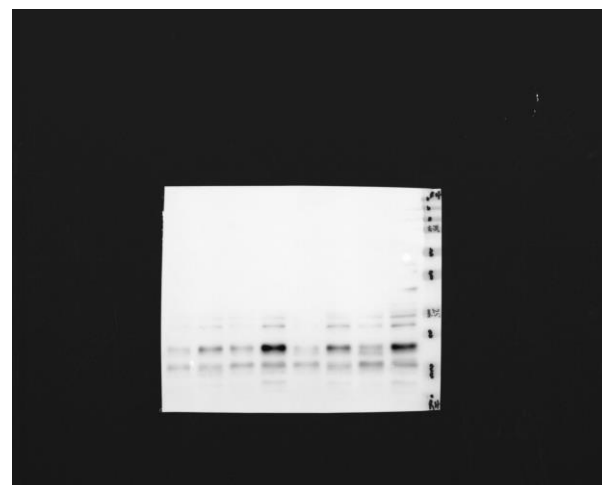

← 25 kDa  
← 20 kDa

# Hepatic $\beta$ actin– 42 kDa

Gel 1

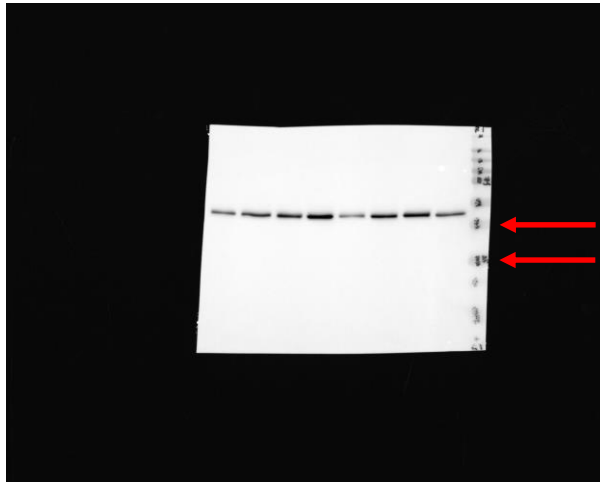

Dahl R

Gel 2

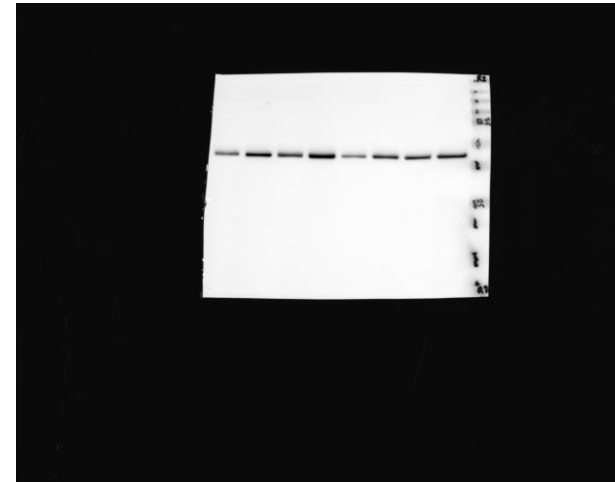

Gel 3

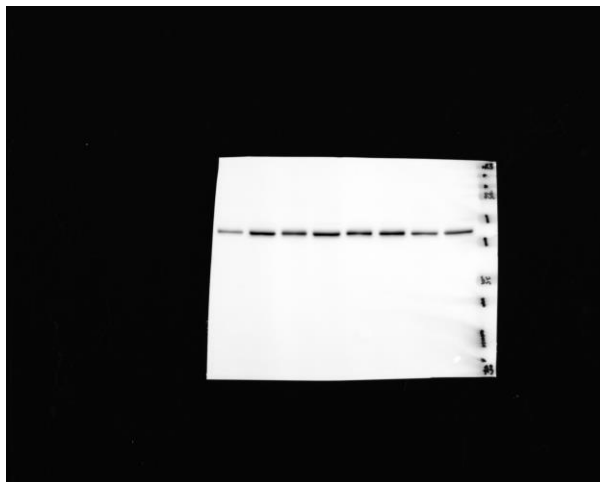

Gel 4

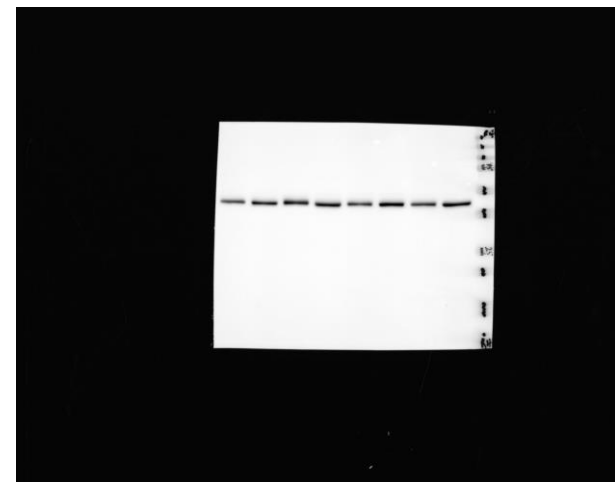

37 kDa  
25 kDa

# How to read the uncropped/unrotated membranes: Set 3 loading

Similar to set 1, Dahl S samples, for an unknown reason, saturated the images and decreased the pixel density of Dahl R samples. Therefore, Dahl R samples were excluded from analysis.

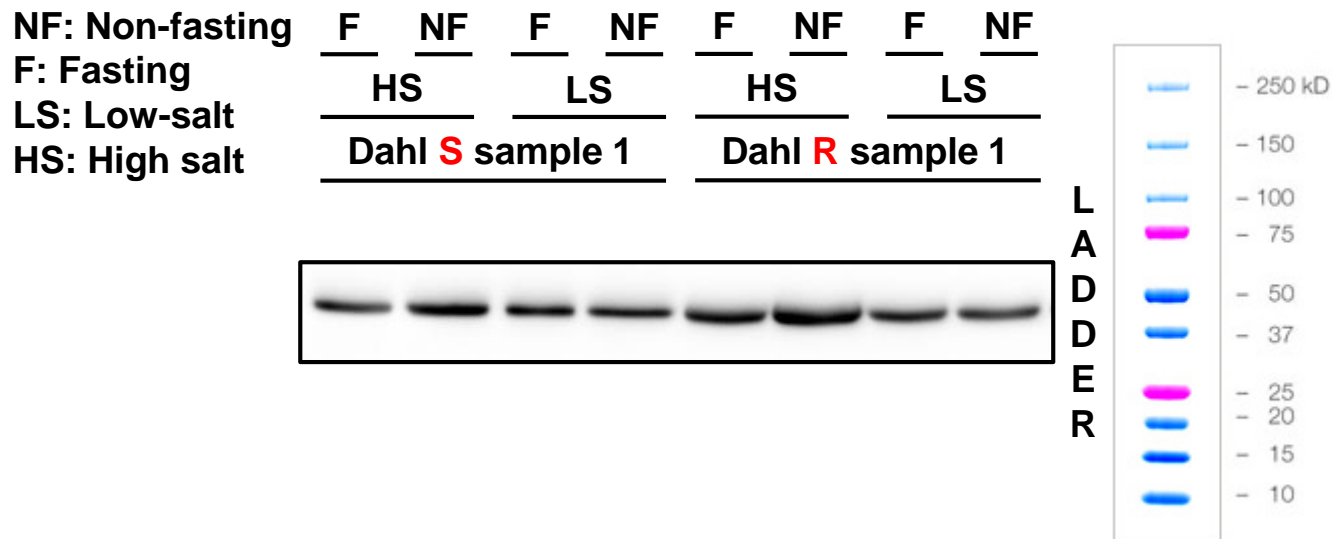

\*Dahl S and Dahl R were analyzed independently

\*\*Gel 6 consisted of two sets of Dahl S samples, and no Dahl R

# p62 – 62 kDa

Gel 1

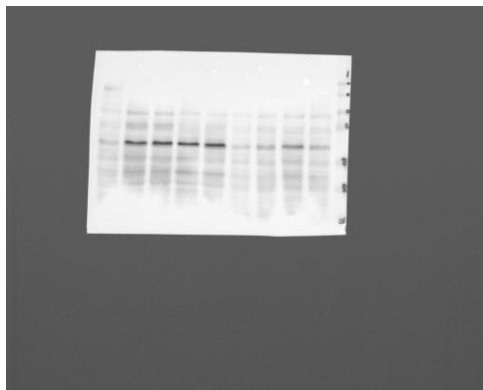

Gel 2

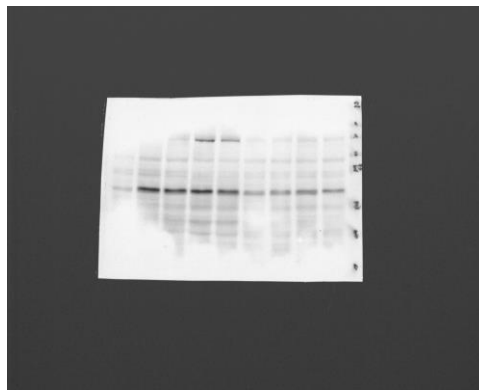

Gel 3

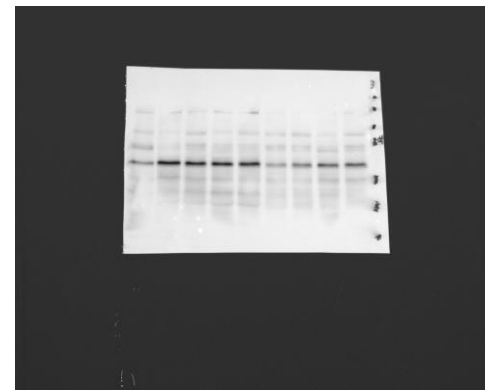

Gel 4

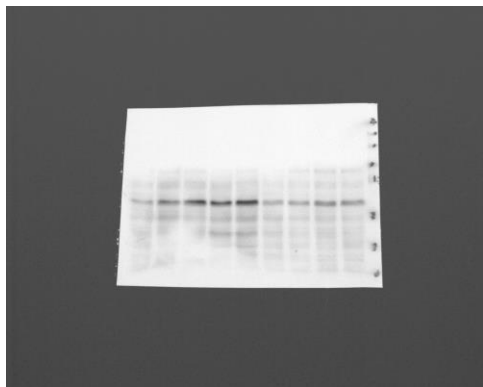

Gel 5

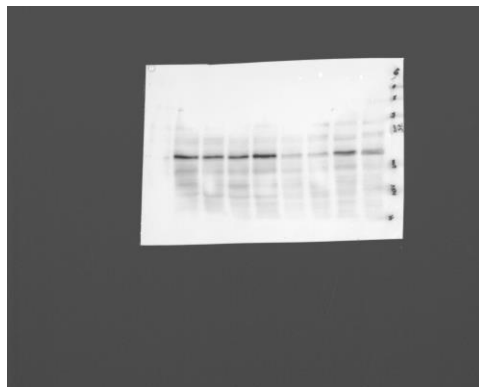

Gel 6

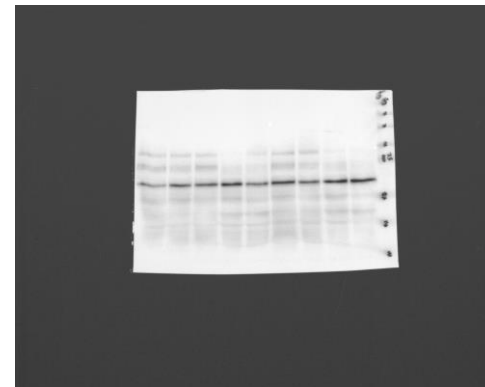

# $\beta$ actin – 42 kDa

Gel 1

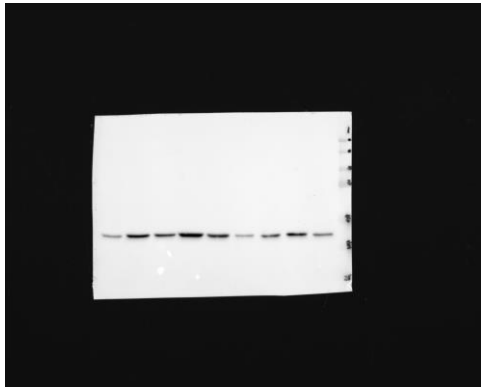

Gel 2

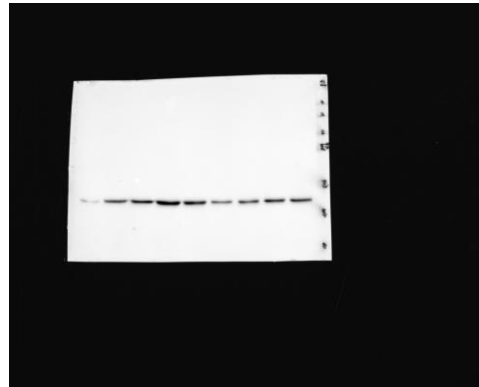

Gel 3

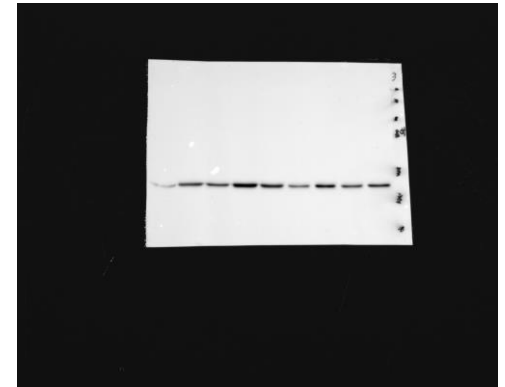

Gel 4

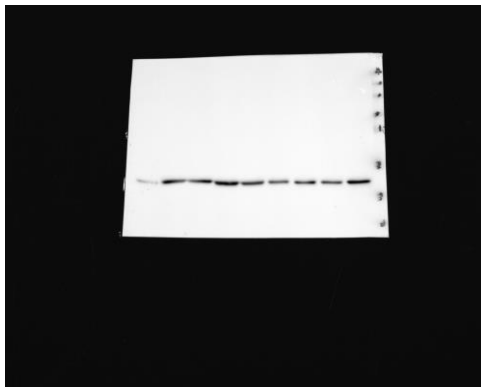

Gel 5

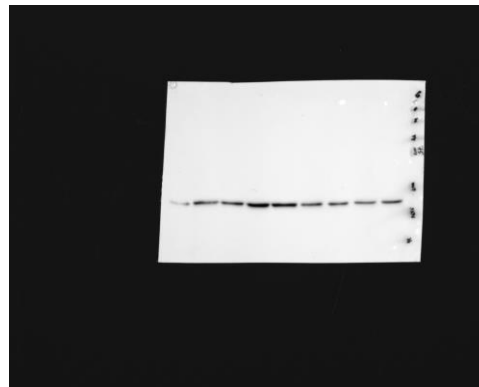

Gel 6

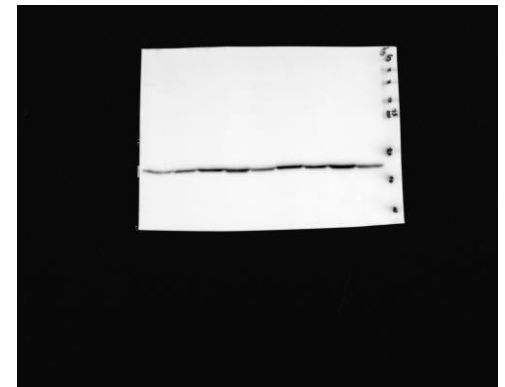

Supplement: sd1 [file 1]
